# Supplementary material for: Low-temperature synthesis of 2D anisotropic MoTe2 using a high-pressure soft sputtering technique
Source: Royal Society of Chemistry journal article supplement (doi:10.1039/d0na00066c), 2020-01-01
Supplement: d0na00066c1.pdf [file d0na00066c1.pdf]

## Supporting information

### Low-temperature synthesis of 2D anisotropic MoTe<sub>2</sub> using high-pressure soft sputtering technique

Kentaro Yumigeta<sup>+</sup>, Cameron Kopas<sup>+</sup>, Mark Blei, Debarati Hajra, Yuxia Shen, Dipesh Trivedi, Pranvera Kolari, Nathan Newman, and Sefaattin Tongay\*

School for Engineering of Matter, Transport and Energy, Arizona State University, Tempe, AZ 85287, USA

\* Corresponding author: sefaattintongay@asu.edu

<sup>+</sup> These authors contributed to this work equally

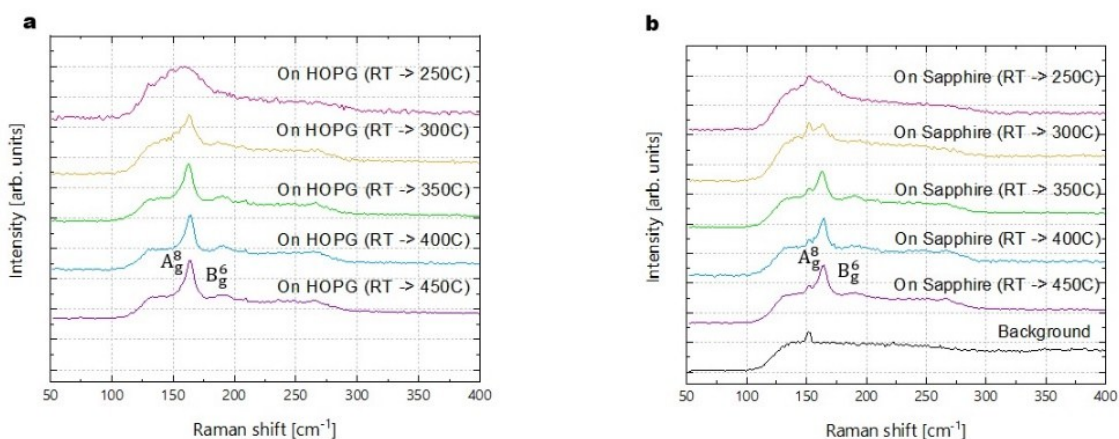

**Figure S1** Raman spectra for MoTe<sub>2</sub> thin film growth followed by in-situ annealing on **a.** HOPG and **b.** sapphire substrate. Raman spectrum for sapphire substrate is shown as background. Peak at 151 cm<sup>-1</sup> in background spectrum is from environment lights through transparent sapphire substrate.

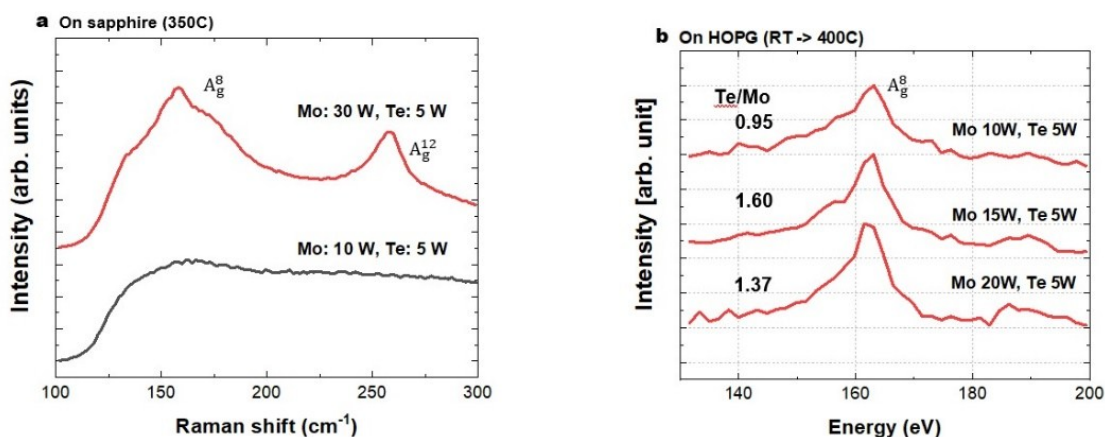

**Figure S2** Raman spectra for MoTe<sub>2</sub> thin film with different Mo sputtering power **a.** on heated substrates and **b.** room temperature deposition followed by annealing.
